# Supplementary material for: The Fast Cooking and Enhanced Iron Bioavailability Properties of the Manteca Yellow Bean (Phaseolus vulgaris L.)
Source: MDPI journal article supplement (doi:10.3390/nu10111609), 2018-11-01
Supplement: s1 [file s1]

**Table S1. Raw Seed Iron Concentrations of the Eighteen Genotypes in the Yellow Bean Panel Organized from Lightest to Darkest Seed Type.<sup>1</sup>**

| <b>Genotype (Seed Type)</b>      | <b>Raw Seed Iron (<math>\mu\text{g/g}</math>)<sup>2</sup></b> |                   |
|----------------------------------|---------------------------------------------------------------|-------------------|
|                                  | <b>2015</b>                                                   | <b>2016</b>       |
| Blanco ( <i>white</i> )          | 59 <sup>gh</sup>                                              | 71 <sup>def</sup> |
| PI527521 ( <i>white</i> )        | 66 <sup>cd</sup>                                              | 73 <sup>cde</sup> |
| Ervilha ( <i>Manteca</i> )       | 55 <sup>hi</sup>                                              | 65 <sup>hij</sup> |
| Cebo ( <i>Manteca</i> )          | 60 <sup>fg</sup>                                              | 69 <sup>efg</sup> |
| Mantega ( <i>Manteca</i> )       | 60 <sup>fg</sup>                                              | 62 <sup>j</sup>   |
| CDC-Sol ( <i>Mayocoba</i> )      | 58 <sup>gh</sup>                                              | 62 <sup>j</sup>   |
| ACC Y012 ( <i>Mayocoba</i> )     | 64 <sup>def</sup>                                             | 62 <sup>j</sup>   |
| Y11405 ( <i>Mayocoba</i> )       | 80 <sup>a</sup>                                               | 79 <sup>ab</sup>  |
| DBY28-1 ( <i>Mayocoba</i> )      | 54 <sup>i</sup>                                               | 63 <sup>ij</sup>  |
| Canario ( <i>Canary</i> )        | 68 <sup>bc</sup>                                              | 76 <sup>bc</sup>  |
| Canario, Cela ( <i>Canary</i> )  | 70 <sup>b</sup>                                               | 69 <sup>fgh</sup> |
| Uyole 04 ( <i>lt. Amarillo</i> ) | 53 <sup>i</sup>                                               | 64 <sup>ij</sup>  |
| Uyole 98 ( <i>dk. Amarillo</i> ) | 61 <sup>fg</sup>                                              | 66 <sup>ghi</sup> |
| Amarelo ( <i>dk. Amarillo</i> )  | 65 <sup>cde</sup>                                             | 73 <sup>cd</sup>  |
| Chumbo ( <i>Njano</i> )          | 62 <sup>f</sup>                                               | 65 <sup>ij</sup>  |
| PI527538 ( <i>Njano</i> )        | 56 <sup>hi</sup>                                              | 66 <sup>ghi</sup> |
| JB178 ( <i>Red Mottled</i> )     | 79 <sup>a</sup>                                               | 81 <sup>a</sup>   |
| PR0737-1 ( <i>Red Mottled</i> )  | 79 <sup>a</sup>                                               | 80 <sup>a</sup>   |

<sup>1</sup>Values are means of duplicate measurements from two field replicates per genotype (n = 4), measured for field seasons 2015 and 2016. Means sharing the same letter in each column are not significantly different at  $P \leq 0.05$ .

<sup>2</sup>Total iron concentrations expressed as micrograms per gram of raw lyophilized/milled whole seed (dry weight).

**Table S2. Iron Concentrations of Pre-Soaked and Cooked Genotypes in the Yellow Bean Panel Organized by Cooking Class.<sup>1</sup>**

| Genotype ( <i>Seed Type</i> )    | Cooking Class | Iron ( $\mu\text{g/g}$ ) <sup>2</sup> |                    |
|----------------------------------|---------------|---------------------------------------|--------------------|
|                                  |               | 2015                                  | 2016               |
| Blanco ( <i>white</i> )          | fast          | 57 <sup>fg</sup>                      | 75 <sup>bcd</sup>  |
| PI527521 ( <i>white</i> )        | fast          | 71 <sup>c</sup>                       | 79 <sup>b</sup>    |
| Ervilha ( <i>Manteca</i> )       | fast          | 58 <sup>fg</sup>                      | 73 <sup>cdef</sup> |
| Cebo ( <i>Manteca</i> )          | fast          | 61 <sup>ef</sup>                      | 72 <sup>defg</sup> |
| Mantega ( <i>Manteca</i> )       | fast          | 61 <sup>fg</sup>                      | 69 <sup>efg</sup>  |
| Uyole 04 ( <i>lt. Amarillo</i> ) | moderate      | 57 <sup>fg</sup>                      | 67 <sup>ghi</sup>  |
| Chumbo ( <i>Njano</i> )          | moderate      | 65 <sup>de</sup>                      | 74 <sup>bcd</sup>  |
| Uyole 98 ( <i>dk. Amarillo</i> ) | moderate      | 60 <sup>fg</sup>                      | 68 <sup>gh</sup>   |
| JB178 ( <i>Red Mottled</i> )     | moderate      | 85 <sup>ab</sup>                      | 90 <sup>a</sup>    |
| ACC Y012 ( <i>Mayocoba</i> )     | moderate      | 60 <sup>fg</sup>                      | 71 <sup>defg</sup> |
| Canario, Cela ( <i>Canary</i> )  | moderate      | 70 <sup>cd</sup>                      | 74 <sup>cde</sup>  |
| CDC-Sol ( <i>Mayocoba</i> )      | moderate      | 57 <sup>fg</sup>                      | 63 <sup>i</sup>    |
| DBY28-1 ( <i>Mayocoba</i> )      | moderate      | 51 <sup>h</sup>                       | 64 <sup>hi</sup>   |
| Y11405 ( <i>Mayocoba</i> )       | moderate      | 80 <sup>b</sup>                       | 78 <sup>bc</sup>   |
| Canario ( <i>Canary</i> )        | slow          | 70 <sup>cd</sup>                      | 77 <sup>bc</sup>   |
| PI527538 ( <i>Njano</i> )        | slow          | 55 <sup>gh</sup>                      | 68 <sup>gh</sup>   |
| PR0737-1 ( <i>Red Mottled</i> )  | slow          | 89 <sup>a</sup>                       | 86 <sup>a</sup>    |
| Amarelo ( <i>dk. Amarillo</i> )  | slow          | 65 <sup>de</sup>                      | 76 <sup>bcd</sup>  |

<sup>1</sup>Values are means of duplicate measurements from two field replicates per genotype (n= 4), measured for field seasons 2015 and 2016. Means sharing the same letter in each column are not significantly different at  $P \leq 0.05$ . Genotypes are categorized top to bottom from the fastest to slowest cooking entry. <sup>2</sup>Total iron concentration measured as micrograms per gram of cooked lyophilized/milled whole seed (dry weight).

**Table S3. Iron Concentrations of Unsoaked and Cooked Genotypes in the Yellow Bean Panel Organized by Cooking Class.<sup>1</sup>**

| <b>Genotype (<i>Seed Type</i>)</b> | <b>Cooking Class</b> | <b>Iron (<math>\mu\text{g/g}</math>)<sup>2</sup></b> |                    |
|------------------------------------|----------------------|------------------------------------------------------|--------------------|
|                                    |                      | 2015                                                 | 2016               |
| Blanco ( <i>white</i> )            | fast                 | 60 <sup>efg</sup>                                    | 70 <sup>bc</sup>   |
| PI527521 ( <i>white</i> )          | fast                 | 69 <sup>bc</sup>                                     | 70 <sup>bc</sup>   |
| Ervilha ( <i>Manteca</i> )         | fast                 | 59 <sup>fg</sup>                                     | 67 <sup>cdef</sup> |
| Cebo ( <i>Manteca</i> )            | fast                 | 56 <sup>ghi</sup>                                    | 65 <sup>defg</sup> |
| Mantega ( <i>Manteca</i> )         | fast                 | 59 <sup>fgh</sup>                                    | 65 <sup>defg</sup> |
| Uyole 04 ( <i>lt. Amarillo</i> )   | moderate             | 54 <sup>hi</sup>                                     | 68 <sup>bcde</sup> |
| Chumbo ( <i>Njano</i> )            | moderate             | 65 <sup>cde</sup>                                    | 64 <sup>efg</sup>  |
| Uyole 98 ( <i>dk. Amarillo</i> )   | moderate             | 63 <sup>def</sup>                                    | 66 <sup>cdef</sup> |
| JB178 ( <i>Red Mottled</i> )       | moderate             | 82 <sup>a</sup>                                      | 82 <sup>a</sup>    |
| Canario, Cela ( <i>Canary</i> )    | moderate             | 73 <sup>b</sup>                                      | 67 <sup>cde</sup>  |
| Y11405 ( <i>Mayocoba</i> )         | moderate             | 81 <sup>a</sup>                                      | 79 <sup>a</sup>    |
| DBY28-1 ( <i>Mayocoba</i> )        | moderate             | 53 <sup>i</sup>                                      | 62 <sup>fgh</sup>  |
| PI527538 ( <i>Njano</i> )          | moderate             | 56 <sup>ghi</sup>                                    | 64 <sup>efg</sup>  |
| Canario ( <i>Canary</i> )          | slow                 | 68 <sup>bc</sup>                                     | 73 <sup>b</sup>    |
| ACC Y012 ( <i>Mayocoba</i> )       | slow                 | 62 <sup>def</sup>                                    | 61 <sup>gh</sup>   |
| CDC-Sol ( <i>Mayocoba</i> )        | slow                 | 59 <sup>fgh</sup>                                    | 59 <sup>h</sup>    |
| PR0737-1 ( <i>Red Mottled</i> )    | slow                 | 82 <sup>a</sup>                                      | 81 <sup>a</sup>    |
| Amarelo ( <i>dk. Amarillo</i> )    | slow                 | 66 <sup>cd</sup>                                     | 70 <sup>bcd</sup>  |

<sup>1</sup>Values are means of duplicate measurements from two field replicates per genotype (n = 4), measured for field seasons 2015 and 2016. Means sharing the same letter in each column are not significantly different at  $P \leq 0.05$ . Genotypes are categorized top to bottom from the fastest to slowest cooking entry. <sup>2</sup>Total iron concentration measured as micrograms per gram of cooked lyophilized/milled whole seed (dry weight).

**Table S4. Iron Contents and Retention Values of *Pre-Soaked* and Cooked Genotypes in the Yellow Bean Panel Organized by Cooking Class.<sup>1</sup>**

| Genotype ( <i>Seed Type</i> )    | Cooking Class | Iron (mg/100 seed) <sup>2</sup> |                      |                            |                     |                      |                    |
|----------------------------------|---------------|---------------------------------|----------------------|----------------------------|---------------------|----------------------|--------------------|
|                                  |               | 2015                            |                      |                            | 2016                |                      |                    |
|                                  |               | Raw                             | Cooked               | Retention (%) <sup>3</sup> | Raw                 | Cooked               | Retention (%)      |
| Blanco ( <i>white</i> )          | fast          | 2.97 <sup>c</sup>               | 2.55 <sup>c</sup>    | 86 <sup>abc</sup>          | 3.88 <sup>a</sup>   | 3.27 <sup>a</sup>    | 84 <sup>cdef</sup> |
| PI527521 ( <i>white</i> )        | fast          | 2.61 <sup>de</sup>              | 2.20 <sup>defg</sup> | 84 <sup>bcd</sup>          | 3.19 <sup>b</sup>   | 2.71 <sup>bcd</sup>  | 85 <sup>cdef</sup> |
| Ervilha ( <i>Manteca</i> )       | fast          | 2.69 <sup>d</sup>               | 2.34 <sup>cde</sup>  | 87 <sup>abc</sup>          | 3.36 <sup>b</sup>   | 2.92 <sup>b</sup>    | 87 <sup>abc</sup>  |
| Cebo ( <i>Manteca</i> )          | fast          | 2.13 <sup>h</sup>               | 1.82 <sup>h</sup>    | 85 <sup>abc</sup>          | 2.23 <sup>g</sup>   | 1.98 <sup>ij</sup>   | 89 <sup>abc</sup>  |
| Mantega ( <i>Manteca</i> )       | fast          | 2.58 <sup>de</sup>              | 2.15 <sup>efg</sup>  | 83 <sup>bcd</sup>          | 2.67 <sup>def</sup> | 2.43 <sup>efg</sup>  | 91 <sup>a</sup>    |
| Uyole 04 ( <i>lt. Amarillo</i> ) | moderate      | 2.29 <sup>fgh</sup>             | 2.00 <sup>fgh</sup>  | 87 <sup>ab</sup>           | 2.76 <sup>cde</sup> | 2.39 <sup>efg</sup>  | 86 <sup>abcd</sup> |
| Chumbo ( <i>Njano</i> )          | moderate      | 2.37 <sup>fg</sup>              | 1.98 <sup>fgh</sup>  | 84 <sup>bcd</sup>          | 2.88 <sup>cd</sup>  | 2.52 <sup>cdef</sup> | 87 <sup>abc</sup>  |
| Uyole 98 ( <i>dk. Amarillo</i> ) | moderate      | 2.47 <sup>ef</sup>              | 2.01 <sup>fgh</sup>  | 81 <sup>def</sup>          | 2.76 <sup>cde</sup> | 2.28 <sup>fgh</sup>  | 83 <sup>defg</sup> |
| JB178 ( <i>Red Mottled</i> )     | moderate      | 3.77 <sup>b</sup>               | 3.31 <sup>a</sup>    | 88 <sup>a</sup>            | 3.67 <sup>a</sup>   | 3.31 <sup>a</sup>    | 90 <sup>ab</sup>   |
| ACC Y012 ( <i>Mayocoba</i> )     | moderate      | 2.74 <sup>d</sup>               | 2.24 <sup>def</sup>  | 82 <sup>def</sup>          | 2.92 <sup>c</sup>   | 2.49 <sup>def</sup>  | 85 <sup>bcd</sup>  |
| Canario, Cela ( <i>Canary</i> )  | moderate      | 3.08 <sup>c</sup>               | 2.51 <sup>c</sup>    | 82 <sup>cdef</sup>         | 2.90 <sup>cd</sup>  | 2.44 <sup>efg</sup>  | 84 <sup>cdef</sup> |
| CDC-Sol ( <i>Mayocoba</i> )      | moderate      | 2.97 <sup>c</sup>               | 2.44 <sup>cd</sup>   | 82 <sup>cdef</sup>         | 2.78 <sup>cde</sup> | 2.29 <sup>fgh</sup>  | 82 <sup>defg</sup> |
| DBY28-1 ( <i>Mayocoba</i> )      | moderate      | 2.20 <sup>gh</sup>              | 1.78 <sup>h</sup>    | 81 <sup>defg</sup>         | 2.47 <sup>fg</sup>  | 2.01 <sup>ij</sup>   | 81 <sup>efg</sup>  |
| Y11405 ( <i>Mayocoba</i> )       | moderate      | 4.12 <sup>a</sup>               | 3.31 <sup>a</sup>    | 80 <sup>efg</sup>          | 3.25 <sup>b</sup>   | 2.64 <sup>cde</sup>  | 81 <sup>efg</sup>  |
| Canario ( <i>Canary</i> )        | slow          | 2.69 <sup>d</sup>               | 2.13 <sup>efg</sup>  | 79 <sup>fg</sup>           | 2.56 <sup>ef</sup>  | 2.08 <sup>hi</sup>   | 81 <sup>efg</sup>  |
| PI527538 ( <i>Njano</i> )        | slow          | 2.48 <sup>ef</sup>              | 1.97 <sup>gh</sup>   | 79 <sup>fg</sup>           | 2.76 <sup>cde</sup> | 2.22 <sup>ghi</sup>  | 80 <sup>fg</sup>   |
| PR0737-1 ( <i>Red Mottled</i> )  | slow          | 3.65 <sup>b</sup>               | 3.03 <sup>b</sup>    | 83 <sup>cde</sup>          | 3.26 <sup>b</sup>   | 2.76 <sup>bc</sup>   | 85 <sup>cdef</sup> |
| Amarelo ( <i>dk. Amarillo</i> )  | slow          | 1.84 <sup>i</sup>               | 1.41 <sup>i</sup>    | 77 <sup>g</sup>            | 2.23 <sup>g</sup>   | 1.75 <sup>j</sup>    | 79 <sup>g</sup>    |

<sup>1</sup>Values are means of duplicate measurements from two field replicates per genotype (n = 4), measured for field seasons 2015 and 2016. Means sharing the same letter in each column are not significantly different at  $P \leq 0.05$ . Genotypes are categorized top to bottom from the fastest to slowest cooking entry. <sup>2</sup>Iron seed content calculated as the total milligrams in 100 intact lyophilized raw or cooked whole seed (dry weight). <sup>3</sup>Retention values calculated by comparing content differences between 100 lyophilized raw and cooked whole seed.

**Table S5. Iron Contents and Retention Values of Unsoaked and Cooked Genotypes in the Yellow Bean Panel Organized by Cooking Class.<sup>1</sup>**

| Genotype ( <i>Seed Type</i> )    | Cooking Class | Iron (mg/100 seed) <sup>2</sup> |                     |                            |                      |                    |                   |
|----------------------------------|---------------|---------------------------------|---------------------|----------------------------|----------------------|--------------------|-------------------|
|                                  |               | 2015                            |                     |                            | 2016                 |                    |                   |
|                                  |               | Raw                             | Cooked              | Retention (%) <sup>3</sup> | Raw                  | Cooked             | Retention (%)     |
| Blanco ( <i>white</i> )          | fast          | 3.33 <sup>bc</sup>              | 2.72 <sup>bc</sup>  | 82 <sup>abc</sup>          | 3.64 <sup>a</sup>    | 2.91 <sup>a</sup>  | 80 <sup>abc</sup> |
| PI527521 ( <i>white</i> )        | fast          | 2.87 <sup>fgh</sup>             | 2.31 <sup>def</sup> | 81 <sup>abc</sup>          | 3.02 <sup>cd</sup>   | 2.55 <sup>bc</sup> | 80 <sup>abc</sup> |
| Ervilha ( <i>Manteca</i> )       | fast          | 3.06 <sup>def</sup>             | 2.59 <sup>bc</sup>  | 84 <sup>ab</sup>           | 3.19 <sup>bc</sup>   | 2.64 <sup>bc</sup> | 83 <sup>ab</sup>  |
| Cebo ( <i>Manteca</i> )          | fast          | 2.27 <sup>k</sup>               | 1.82 <sup>h</sup>   | 80 <sup>abc</sup>          | 2.65 <sup>fghi</sup> | 2.13 <sup>ef</sup> | 80 <sup>abc</sup> |
| Mantega ( <i>Manteca</i> )       | fast          | 2.60 <sup>ij</sup>              | 2.14 <sup>fg</sup>  | 82 <sup>abc</sup>          | 2.59 <sup>hi</sup>   | 2.19 <sup>de</sup> | 84 <sup>a</sup>   |
| Uyole 04 ( <i>lt. Amarillo</i> ) | moderate      | 2.45 <sup>jk</sup>              | 1.99 <sup>gh</sup>  | 81 <sup>abc</sup>          | 2.63 <sup>ghi</sup>  | 2.21 <sup>de</sup> | 84 <sup>a</sup>   |
| Chumbo ( <i>Njano</i> )          | moderate      | 2.45 <sup>jk</sup>              | 2.00 <sup>gh</sup>  | 82 <sup>abc</sup>          | 2.43 <sup>i</sup>    | 1.97 <sup>f</sup>  | 81 <sup>abc</sup> |
| Uyole 98 ( <i>dk. Amarillo</i> ) | moderate      | 2.70 <sup>hi</sup>              | 2.16 <sup>fg</sup>  | 80 <sup>bcd</sup>          | 2.85 <sup>defg</sup> | 2.25 <sup>de</sup> | 79 <sup>bcd</sup> |
| JB178 ( <i>Red Mottled</i> )     | moderate      | 3.25 <sup>bcd</sup>             | 2.77 <sup>b</sup>   | 85 <sup>a</sup>            | 3.33 <sup>b</sup>    | 2.73 <sup>ab</sup> | 82 <sup>abc</sup> |
| Canario, Cela ( <i>Canary</i> )  | moderate      | 3.42 <sup>b</sup>               | 2.69 <sup>bc</sup>  | 79 <sup>cd</sup>           | 2.88 <sup>def</sup>  | 2.22 <sup>de</sup> | 77 <sup>def</sup> |
| Y11405 ( <i>Mayocoba</i> )       | moderate      | 4.12 <sup>a</sup>               | 3.18 <sup>a</sup>   | 77 <sup>cd</sup>           | 3.40 <sup>ab</sup>   | 2.67 <sup>ab</sup> | 78 <sup>cde</sup> |
| DBY28-1 ( <i>Mayocoba</i> )      | moderate      | 2.26 <sup>k</sup>               | 1.76 <sup>h</sup>   | 78 <sup>cd</sup>           | 2.64 <sup>fghi</sup> | 2.04 <sup>ef</sup> | 77 <sup>def</sup> |
| PI527538 ( <i>Njano</i> )        | moderate      | 2.85 <sup>gh</sup>              | 2.20 <sup>fg</sup>  | 77 <sup>cd</sup>           | 2.78 <sup>efgh</sup> | 2.06 <sup>ef</sup> | 74 <sup>ef</sup>  |
| Canario ( <i>Canary</i> )        | slow          | 2.94 <sup>efg</sup>             | 2.22 <sup>efg</sup> | 75 <sup>de</sup>           | 2.94 <sup>de</sup>   | 2.15 <sup>de</sup> | 73 <sup>ef</sup>  |
| ACC Y012 ( <i>Mayocoba</i> )     | slow          | 2.79 <sup>ghi</sup>             | 2.19 <sup>fg</sup>  | 78 <sup>cd</sup>           | 2.62 <sup>ghi</sup>  | 2.09 <sup>ef</sup> | 80 <sup>abc</sup> |
| CDC-Sol ( <i>Mayocoba</i> )      | slow          | 3.11 <sup>de</sup>              | 2.47 <sup>cde</sup> | 79 <sup>bcd</sup>          | 2.73 <sup>efgh</sup> | 2.13 <sup>ef</sup> | 79 <sup>bcd</sup> |
| PR0737-1 ( <i>Red Mottled</i> )  | slow          | 3.21 <sup>cd</sup>              | 2.50 <sup>cd</sup>  | 76 <sup>cd</sup>           | 3.29 <sup>b</sup>    | 2.55 <sup>bc</sup> | 77 <sup>cde</sup> |
| Amarelo ( <i>dk. Amarillo</i> )  | slow          | 1.80 <sup>l</sup>               | 1.29 <sup>i</sup>   | 71 <sup>e</sup>            | 2.16 <sup>j</sup>    | 1.56 <sup>g</sup>  | 72 <sup>f</sup>   |

<sup>1</sup>Values are means of duplicate measurements from two field replicates per genotype (n = 4), measured for field seasons 2015 and 2016. Means sharing the same letter in each column are not significantly different at  $P \leq 0.05$ . Genotypes are categorized top to bottom from the fastest to slowest cooking entry. <sup>2</sup>Iron seed content calculated as the total milligrams in 100 intact lyophilized raw or cooked whole seed (dry weight). <sup>3</sup>Retention values calculated by comparing content differences between 100 lyophilized raw and cooked whole seed.

**Table S6. Iron Bioavailability Scores of *Pre-Soaked* and Cooked Genotypes in the Yellow Bean Panel Organized by Cooking Class.<sup>1</sup>**

| <b>Genotype (<i>Seed Type</i>)</b> | <b>Cooking Class</b> | <b>Iron Bioavailability (% control)<sup>2</sup></b> |                   |
|------------------------------------|----------------------|-----------------------------------------------------|-------------------|
|                                    |                      | 2015                                                | 2016              |
| Blanco ( <i>white</i> )            | fast                 | 101 <sup>ab</sup>                                   | 97 <sup>bc</sup>  |
| PI527521 ( <i>white</i> )          | fast                 | 107 <sup>a</sup>                                    | 100 <sup>bc</sup> |
| Ervilha ( <i>Manteca</i> )         | fast                 | 100 <sup>ab</sup>                                   | 105 <sup>b</sup>  |
| Cebo ( <i>Manteca</i> )            | fast                 | 101 <sup>ab</sup>                                   | 136 <sup>a</sup>  |
| Mantega ( <i>Manteca</i> )         | fast                 | 107 <sup>a</sup>                                    | 104 <sup>bc</sup> |
| Uyole 04 ( <i>lt. Amarillo</i> )   | moderate             | 74 <sup>cd</sup>                                    | 87 <sup>bcd</sup> |
| Chumbo ( <i>Njano</i> )            | moderate             | 63 <sup>de</sup>                                    | 58 <sup>efg</sup> |
| Uyole 98 ( <i>dk. Amarillo</i> )   | moderate             | 61 <sup>def</sup>                                   | 50 <sup>fg</sup>  |
| JB178 ( <i>Red Mottled</i> )       | moderate             | 43 <sup>fg</sup>                                    | 45 <sup>fgh</sup> |
| ACC Y012 ( <i>Mayocoba</i> )       | moderate             | 66 <sup>de</sup>                                    | 60 <sup>ef</sup>  |
| Canario, Cela ( <i>Canary</i> )    | moderate             | 60 <sup>def</sup>                                   | 43 <sup>fgh</sup> |
| CDC-Sol ( <i>Mayocoba</i> )        | moderate             | 57 <sup>def</sup>                                   | 47 <sup>fgh</sup> |
| DBY28-1 ( <i>Mayocoba</i> )        | moderate             | 67 <sup>cde</sup>                                   | 71 <sup>de</sup>  |
| Y11405 ( <i>Mayocoba</i> )         | moderate             | 84 <sup>bc</sup>                                    | 86 <sup>cd</sup>  |
| Canario ( <i>Canary</i> )          | slow                 | 55 <sup>ef</sup>                                    | 41 <sup>gh</sup>  |
| PI527538 ( <i>Njano</i> )          | slow                 | 34 <sup>gh</sup>                                    | 44 <sup>fgh</sup> |
| PR0737-1 ( <i>Red Mottled</i> )    | slow                 | 34 <sup>gh</sup>                                    | 29 <sup>hi</sup>  |
| Amarelo ( <i>dk. Amarillo</i> )    | slow                 | 19 <sup>h</sup>                                     | 22 <sup>i</sup>   |

<sup>1</sup>Values are means of triplicate measurements from two field replicates per genotype (n = 6), measured for field seasons 2015 and 2016. Means sharing the same letter in each column are not significantly different at  $P \leq 0.05$ . Genotypes are categorized top to bottom from the fastest to slowest cooking entry. <sup>2</sup>*In vitro* iron bioavailability is expressed as a percentage score of Caco-2 cell ferritin formation (ng ferritin / mg total cell protein) that is relative to a white navy bean (cv. Merlin) control, following *in vitro* digestion of lyophilized cooked whole seed.

**Table S7. Iron Bioavailability Scores of **Unsoaked** and Cooked Genotypes in the Yellow Bean Panel Organized by Cooking Class.<sup>1</sup>**

| <b>Genotype (<i>Seed Type</i>)</b> | <b>Cooking Class</b> | <b>Iron Bioavailability (% control)<sup>2</sup></b> |                   |
|------------------------------------|----------------------|-----------------------------------------------------|-------------------|
|                                    |                      | 2015                                                | 2016              |
| Blanco ( <i>white</i> )            | fast                 | 103 <sup>cd</sup>                                   | 97 <sup>bcd</sup> |
| PI527521 ( <i>white</i> )          | fast                 | 125 <sup>b</sup>                                    | 104 <sup>b</sup>  |
| Ervilha ( <i>Manteca</i> )         | fast                 | 124 <sup>b</sup>                                    | 125 <sup>a</sup>  |
| Cebo ( <i>Manteca</i> )            | fast                 | 109 <sup>bc</sup>                                   | 111 <sup>ab</sup> |
| Mantega ( <i>Manteca</i> )         | fast                 | 159 <sup>a</sup>                                    | 100 <sup>bc</sup> |
| Uyole 04 ( <i>lt. Amarillo</i> )   | moderate             | 86 <sup>de</sup>                                    | 79 <sup>def</sup> |
| Chumbo ( <i>Njano</i> )            | moderate             | 64 <sup>fg</sup>                                    | 69 <sup>efg</sup> |
| Uyole 98 ( <i>dk. Amarillo</i> )   | moderate             | 63 <sup>fg</sup>                                    | 50 <sup>hi</sup>  |
| JB178 ( <i>Red Mottled</i> )       | moderate             | 33 <sup>h</sup>                                     | 50 <sup>hi</sup>  |
| Canario, Cela ( <i>Canary</i> )    | moderate             | 66 <sup>fg</sup>                                    | 50 <sup>hi</sup>  |
| Y11405 ( <i>Mayocoba</i> )         | moderate             | 80 <sup>ef</sup>                                    | 76 <sup>ef</sup>  |
| DBY28-1 ( <i>Mayocoba</i> )        | moderate             | 87 <sup>de</sup>                                    | 84 <sup>cde</sup> |
| PI527538 ( <i>Njano</i> )          | moderate             | 34 <sup>h</sup>                                     | 62 <sup>fgh</sup> |
| Canario ( <i>Canary</i> )          | slow                 | 55 <sup>g</sup>                                     | 51 <sup>ghi</sup> |
| ACC Y012 ( <i>Mayocoba</i> )       | slow                 | 79 <sup>ef</sup>                                    | 47 <sup>hi</sup>  |
| CDC-Sol ( <i>Mayocoba</i> )        | slow                 | 69 <sup>f</sup>                                     | 57 <sup>ghi</sup> |
| PR0737-1 ( <i>Red Mottled</i> )    | slow                 | 24 <sup>h</sup>                                     | 41 <sup>ij</sup>  |
| Amarelo ( <i>dk. Amarillo</i> )    | slow                 | 20 <sup>h</sup>                                     | 24 <sup>j</sup>   |

<sup>1</sup>Values are means of triplicate measurement from two field replicates per genotype (n = 6), measured for field seasons 2015 and 2016. Means sharing the same letter in each column are not significantly different at  $P \leq 0.05$ . Genotypes are categorized top to bottom from the fastest to slowest cooking entry. <sup>2</sup>*In vitro* iron bioavailability is expressed as a percentage score of Caco-2 cell ferritin formation (ng ferritin / mg total cell protein) that is relative to a white navy bean (cv. Merlin) control, following *in vitro* digestion of lyophilized cooked whole seed.
